# Supplementary material
Source: MDPI journal article supplement (https://www.mdpi.com/2073-4441/15/8/1542)
Supplement: s1 [file s1 › water-2312131-supplementary.pdf]

*Supplementary Information*

**The Impacts of Climate Change on the Hydrological Process and  
Water Quality in the Three Gorges Reservoir Area, China**

**Yidian Sun <sup>1</sup>, Wanshun Zhang <sup>1,\*</sup>, Hong Peng <sup>2</sup>, Feng Zhou <sup>1</sup>, Anna Jiang <sup>1</sup>, Xiaomin Chen <sup>1,3</sup>  
and Hao Wang <sup>1,4,\*</sup>**

<sup>1</sup> School of Resource and Environmental Sciences, Wuhan University,  
Wuhan 430079, China; yidsun@whu.edu.cn (Y.S.);  
fengzhou@whu.edu.cn (F.Z.); annajiang@whu.edu.cn (A.J.);  
xiaominchen@whu.edu.cn (X.C.)

<sup>2</sup> School of Water Conservancy and Hydropower Engineering,  
Wuhan University, Wuhan 430072, China; hongpeng@whu.edu.cn

<sup>3</sup> Changjiang Institute of Survey, Planning, Design and Research Corporation,  
Wuhan 430000, China

<sup>4</sup> China Institute of Water Resources and Hydropower Research,  
Beijing 100038, China

\* Correspondence: wszhang@whu.edu.cn (W.Z.); wanghao@iwhr.com (H.W.);  
Tel.: +86-139-7148-0859 (W.Z.); +86-139-1022-0531 (H.W.)

## 1. The sources of foundation database for SWAT model

As a GIS-based watershed model, the SWAT model requires the Digital Elevation Model (DEM), land use, soil types, and observed meteorological and hydrological data to run. In the present study, the basic data of the SWAT model are shown in Table S1.

Table S1. The sources of the foundation database for the SWAT model

| Data                             | Data type | Spatial/Temporal resolution | Source                                                                                                                                                         |
|----------------------------------|-----------|-----------------------------|----------------------------------------------------------------------------------------------------------------------------------------------------------------|
| Weather data                     | DBF       | Point/Daily                 | National Meteorological Information Center                                                                                                                     |
| Hydrology and water quality data | Text      | Point/Daily                 | Hydrographical station and water quality monitoring station                                                                                                    |
| DEM                              | GDEM      | 30×30 m                     | Geospatial Data Cloud Site, Computer Network Information Center, Chinese Academy of Sciences.<br>( <a href="http://www.gscloud.cn">http://www.gscloud.cn</a> ) |
| Land use                         | SHAPE     | 1:250,000                   | National Earth System Science Data Sharing Infrastructure                                                                                                      |
| Soil types                       | SHAPE     | 1:500,000                   | Nanjing Institute of Soil Science (OFNISS), Chinese Academy of Science                                                                                         |
| Point source pollution           | SHAPE     | Yearly                      | Chongqing Academy of Environmental Science Hydrographical station and water quality monitoring station                                                         |
| Social and economic              | Text      | -                           | Spot investigation; statistics yearbooks                                                                                                                       |

## 2. The sensitivity of the parameters of the SWAT model

In addition to the calibration and uncertainty analysis, the sensitivity analysis is also embedded into the SUFI-2 algorithm. Considering the unrealizability of adjusting all parameters in the calibration process, sensitive parameters affecting the simulation of runoff and sediment—such as the number of runoff curves in SCS method, effective soil water content, and factors of soil and water conservation measures—were selected for calibration by referring to relevant research results. The results could partly reveal and rank the sensitivity of the parameters and their corresponding processes, which were useful to understand and diagnose the model. The sensitivity of the parameters is divided into four grades: high-grade, middle-grade, primary-grade, and low-grade, which are shown in Table S2.

Table S2. The sensitivity values of the grading standard of the SWAT model.

| Grade | Range                    | Level of sensitivity |
|-------|--------------------------|----------------------|
| IV    | $ RS_i  \geq 1.0$        | High-grade           |
| III   | $0.2 \leq  RS_i  < 1.0$  | Middle-grade         |
| II    | $0.05 \leq  RS_i  < 0.2$ | Primary-grade        |
| I     | $ RS_i  < 0.05$          | Low-grade            |

### 3. The description, sensitivity value, and sensitivity level of the parameters which related to the runoff, total nitrogen, and total phosphorus.

Table S3. The description and calibrated value of the parameters which related to the runoff, total nitrogen, and total phosphorus.

|        | Parameter | Definition                                                                        | Level | Calibrated Value |
|--------|-----------|-----------------------------------------------------------------------------------|-------|------------------|
| Runoff | CN2       | Moisture condition II curve number                                                | IV    | 36–92            |
|        | CH_K2     | Effective hydraulic conductivity, (mm/h)                                          | IV    | 0.1–0.5          |
|        | SOL_AWC   | Soil's available moisture content                                                 | IV    | 0.14–0.18        |
|        | ALPHA_BF  | Baseflow alpha factor, (days)                                                     | III   | 0.01–0.048       |
|        | ESCO      | Soil evaporation compensation factor                                              | III   | 0.33–0.83        |
|        | GW_DELAY  | Groundwater delay, (days)                                                         | III   | 5–15             |
|        | GWQMN     | Threshold depth of water in the shallow aquifer required for return flow to occur | III   | 0–0.014          |
|        | REVAPMN   | Threshold depth of water in the shallow aquifer for revaporization to occur       | III   | 400–460          |
|        | CH_N2     | Manning's value for main channel                                                  | III   | 0.014–0.16       |
|        | SOL_BD    | Soil moisture bulk density, (mm)                                                  | III   | 1.27–1.49        |
| TN     | RCN       | Concentration of nitrogen in rainfall, (mg/kg)                                    | IV    | 0.5–4.0          |
|        | SOL_ORGN  | Initial organic N concentration in the soil layer, (mg/kg)                        | IV    | 5–10             |
|        | SDNCO     | Denitrification threshold water content                                           | III   | 0.5–0.8          |
|        | BC1       | Rate constant for biological oxidation of NH <sub>3</sub>                         | III   | 0.3–0.5          |
|        | BC2       | Rate constant for biological oxidation of NO <sub>2</sub> to NO <sub>3</sub>      | III   | 1.1–1.3          |
| TP     | FILTERW   | Width of the edge of field filter strip, (m)                                      | IV    | 3–5              |
|        | SOL_ORGP  | Initial humic organic phosphorus in soil layer, (mg/kg)                           | IV    | 5–10             |
|        | PHOSKD    | Phosphorus soil partitioning coefficient                                          | IV    | 101–175          |
|        | BC4       | Rate constant for decay of organic phosphorus to dissolved phosphorus             | III   | 0.35–0.80        |
|        | PSP       | Phosphorus sorption coefficient                                                   | III   | 0.7              |

#### 4. Classification methods of climate extreme indicators

In order to further explore the characteristics of extreme climate change in the Three Gorges Reservoir area, the internationally recognized extreme climate indicators (i.e., precipitation index and temperature index) were selected to reflect the changes in the intensity of extreme climate events in the Three Gorges Reservoir area. The specific classification methods were shown in Table S4.

Table S4. Classification methods of climate extreme indicators

| Type                     | Indicator                   | Abbreviation | Meaning                        |
|--------------------------|-----------------------------|--------------|--------------------------------|
| Extreme<br>Precipitation | Severe torrential rain days | P100         | Daily precipitation>100 mm     |
|                          | Torrential rain days        | P50          | Daily precipitation>50 mm      |
|                          | Heavy rain days             | P25          | Daily precipitation>25 mm      |
|                          | Moderate rain days          | P10          | Daily precipitation>10 mm      |
| Extreme<br>Temperature   | Frost days                  | FD           | Daily minimum temperature<0°C  |
|                          | Summer night days           | SND          | Daily minimum temperature>20°C |
|                          | High temperature days       | HTD          | Daily maximum temperature≥35°C |
|                          | Freezing days               | FRD          | Daily maximum temperature<0°C  |
